# Supplementary material for: Luminescent 2D bismuth–cadmium–organic frameworks with tunable and white light emission by doping different lanthanide ions
Source: Royal Society of Chemistry journal article supplement (doi:10.1039/c3dt50826a), 2013-01-01
Supplement: c3dt50826a.pdf [file c3dt50826a.pdf]

### *Supporting Information*

#### **Luminescent 2D bismuth-cadmium-organic frameworks with tunable and white light emission by doping different lanthanide ions**

Xiao-Ping Zhang,<sup>a</sup> Dong-Gen Wang,<sup>b</sup> Ying Su,<sup>a</sup> Han-Rui Tian,<sup>a</sup> Jun-Jie Lin,<sup>a</sup> Yun-Long Feng<sup>a</sup> and Jian-Wen Cheng<sup>\*a</sup>

<sup>a</sup> Key Laboratory of the Ministry of Education for Advanced Catalysis Materials, Institute of Physical Chemistry, Zhejiang Normal University, Jinhua, Zhejiang, 321004, P. R. China; E-mail: jwcheng@zjnu.cn

<sup>b</sup> The Institute of Quality Safety and Standards of Agricultural Product, Jiangxi Academy of Agricultural Sciences, Nanchang, Jiangxi, 330200, P R China

**Materials and methods.** All chemicals were purchased commercially and used without further purification. Elemental analyses were performed on a Vario EL III elemental analyzer. The Fourier transform infrared (FT-IR) spectra (KBr pellets) were recorded on an Nicolet NEXUS670 spectrometer. Thermogravimetric analyses (TGA) were performed on a Netzsch STA 449C analyzer with a heating rate of 10 °C/min under an air atmosphere. Powder X-ray diffraction (PXRD) data were obtained by using a Philips PW3040/60 diffractometer with CuK $\alpha$  radiation ( $\lambda = 1.54056 \text{ \AA}$ ). UV-visible spectra on solid samples were recorded using Thermo Nicolet Evolution 500 UV/vis spectrometer. Photoluminescence analyses were performed on an Edinburgh Instrument FLS920 fluorescence spectrometer. The CIE-1931 chromaticity coordinates were calculated using a ColorCoordinate.exe program.

**Table S1.** Selected Bond Lengths ( $\text{\AA}$ ) for Compound **1**.

|              |          |             |          |          |          |
|--------------|----------|-------------|----------|----------|----------|
| Bi(1)-O(1)   | 2.198(4) | Bi(2)-O(11) | 2.400(3) | Cd-OW1   | 2.260(4) |
| Bi(1)-N(1)   | 2.411(4) | Bi(2)-N(4)  | 2.473(4) | Cd-O(6B) | 2.275(4) |
| Bi(1)-O(7)   | 2.430(3) | Bi(2)-N(3)  | 2.483(4) | Cd-O(10) | 2.291(4) |
| Bi(1)-N(2)   | 2.495(4) | Bi(2)-O(9)  | 2.525(3) | Cd-O(8)  | 2.293(4) |
| Bi(1)-O(12A) | 2.504(4) | Bi(2)-O(4)  | 2.627(4) | Cd-OW2   | 2.294(4) |

|             |          |              |          |         |          |
|-------------|----------|--------------|----------|---------|----------|
| Bi(1)-O(5)  | 2.510(3) | Bi(2)-O(13A) | 2.632(3) | Cd-O(7) | 2.646(3) |
| Bi(1)-O(4)  | 2.540(4) | Bi(2)-O(13)  | 2.634(3) |         |          |
| Bi(2)-O(15) | 2.289(3) | Bi(2)-O(3)   | 2.674(4) |         |          |

<sup>a</sup>Symmetry codes: (A)  $-x + 1, -y, -z + 1$ ; (B)  $-x + 3/2, y + 1/2, z$ .

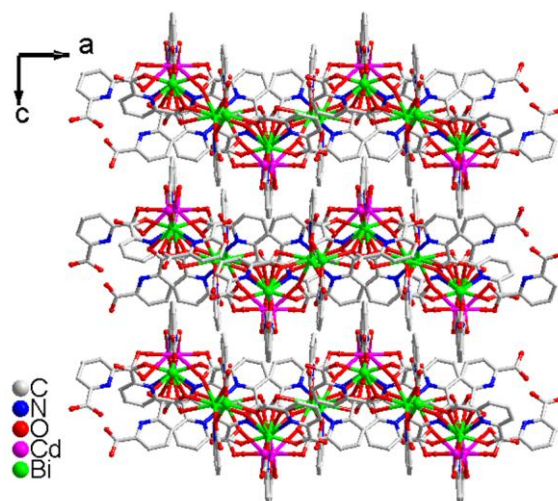

**Fig S1.** The view of 3-D supramolecular compounds stacked along the *c* axis in **1**, involving a weak  $\pi$ - $\pi$  interaction from the pyridyl rings of the adjacent layers.

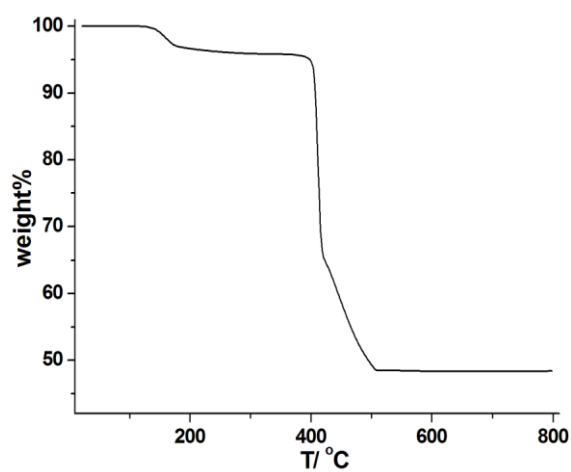

**Fig S2.** TGA curves of **1**.

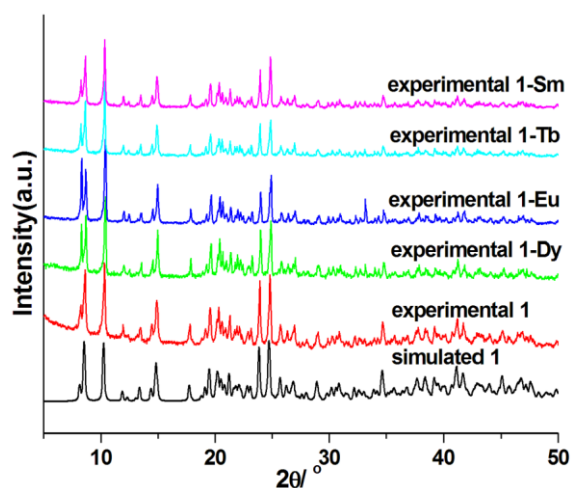

**Fig S3.** Simulated and experimental PXRD patterns of **1**, as well as experimental PXRD patterns of Ln-doped compound **1**.

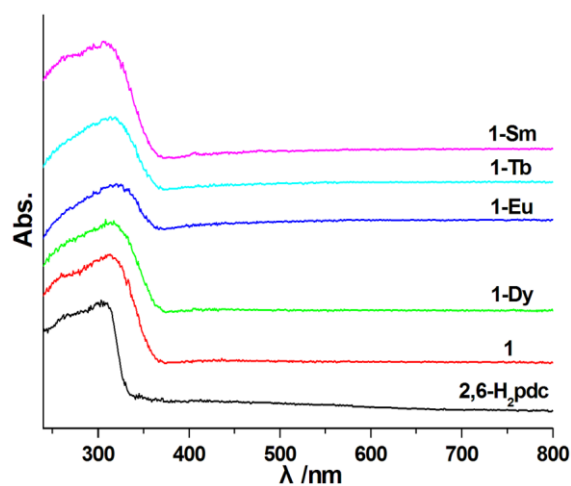

**Fig S4.** UV-Vis spectra of as received 2,6-H<sub>2</sub>pdc, compound **1** and Ln-doped compound **1**.

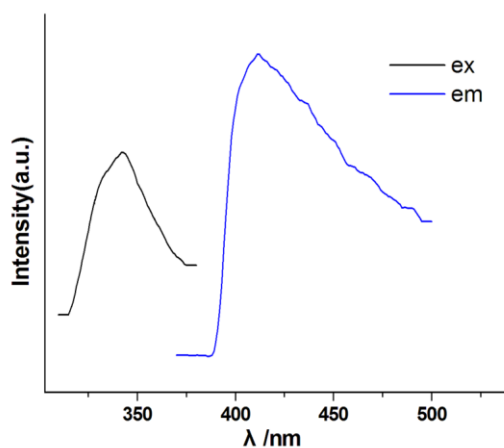

**Fig S5.** The excitation and emission spectra of as received 2,6-H<sub>2</sub>pdc in solid state at room temperature.

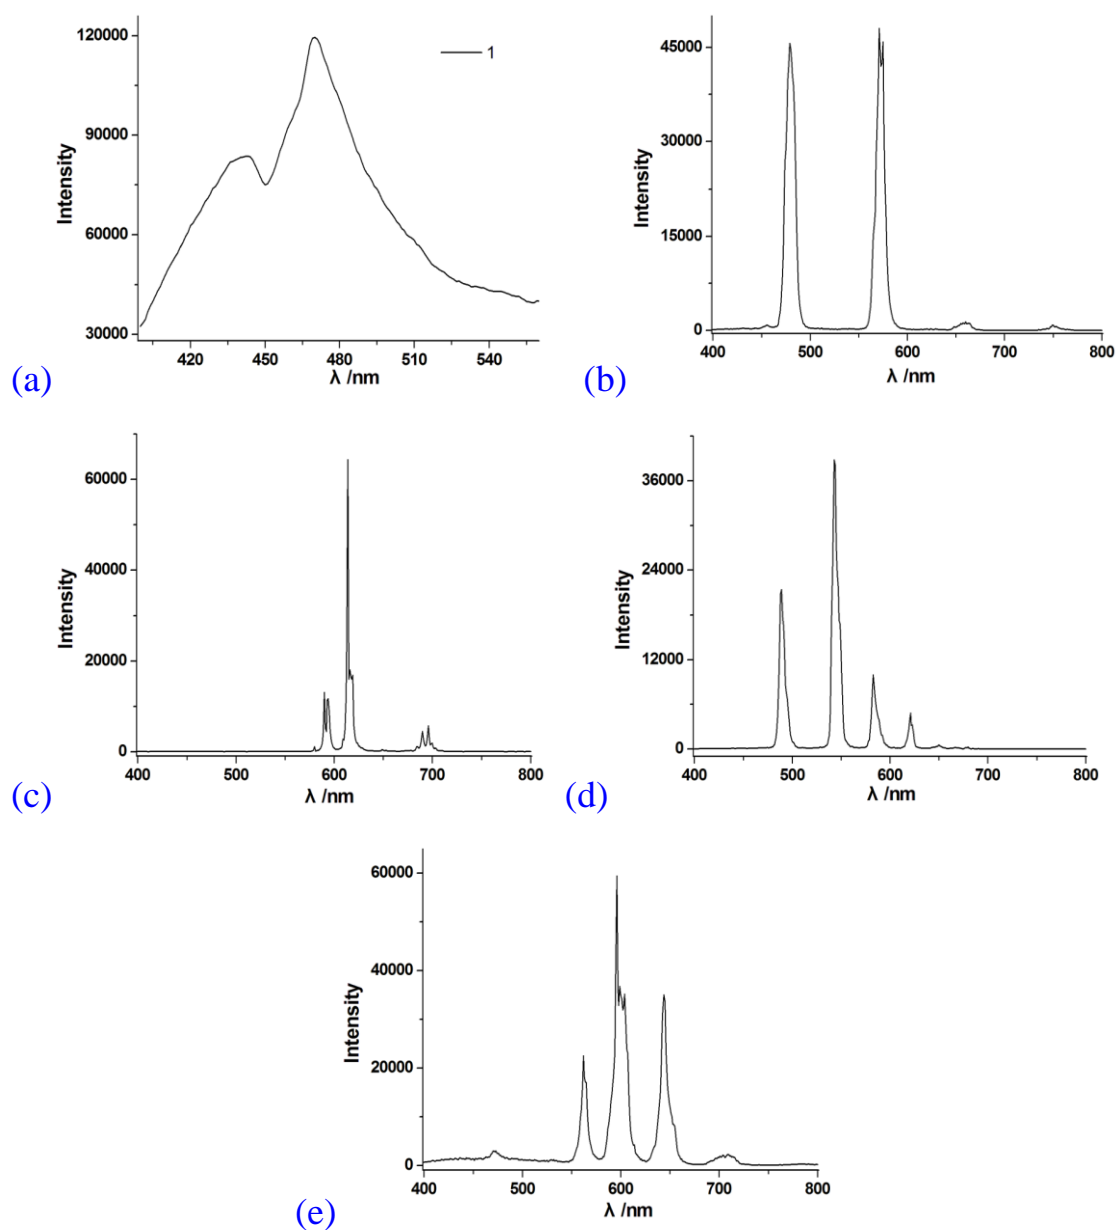

**Fig S6.** Emission spectra of (a) **1** (ex = 324 nm); (b) Dy- (ex = 325 nm), (c) Eu- (ex = 322 nm), (d) Tb- (ex = 322 nm) and (e) Sm- (ex = 325 nm) doped **1**, in solid state at room temperature.

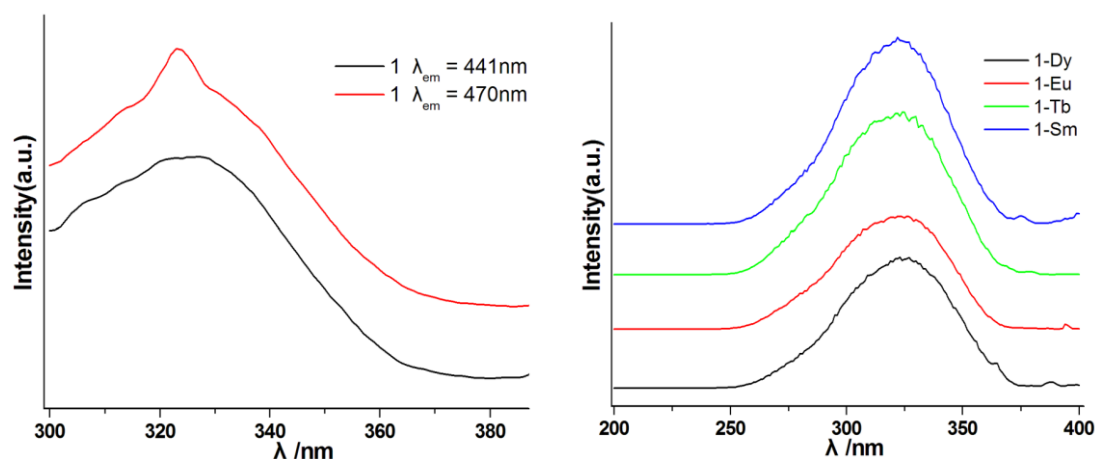

**Fig S7.** (left) The excitation spectra of **1** (emission at 441 nm and 470 nm , respectively), (right) and Ln-doped **1** (emission at 571 nm, 614 nm, 544 nm and 596 nm for Dy-, Eu-, Tb- and Sm-doped **1**, respectively) in solid state at room temperature.

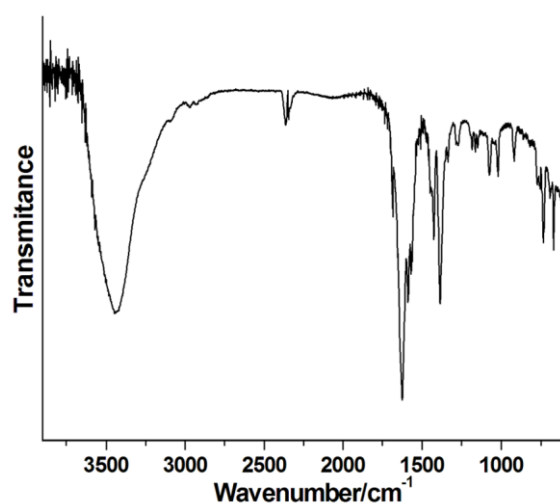

**Fig S8.** The IR spectra of **1**.
